# Supplementary material
Source: HighWire-hosted journal article supplement (https://www.life-science-alliance.org/content/6/4/e202201603/F8)

Supplementary Figure 3B

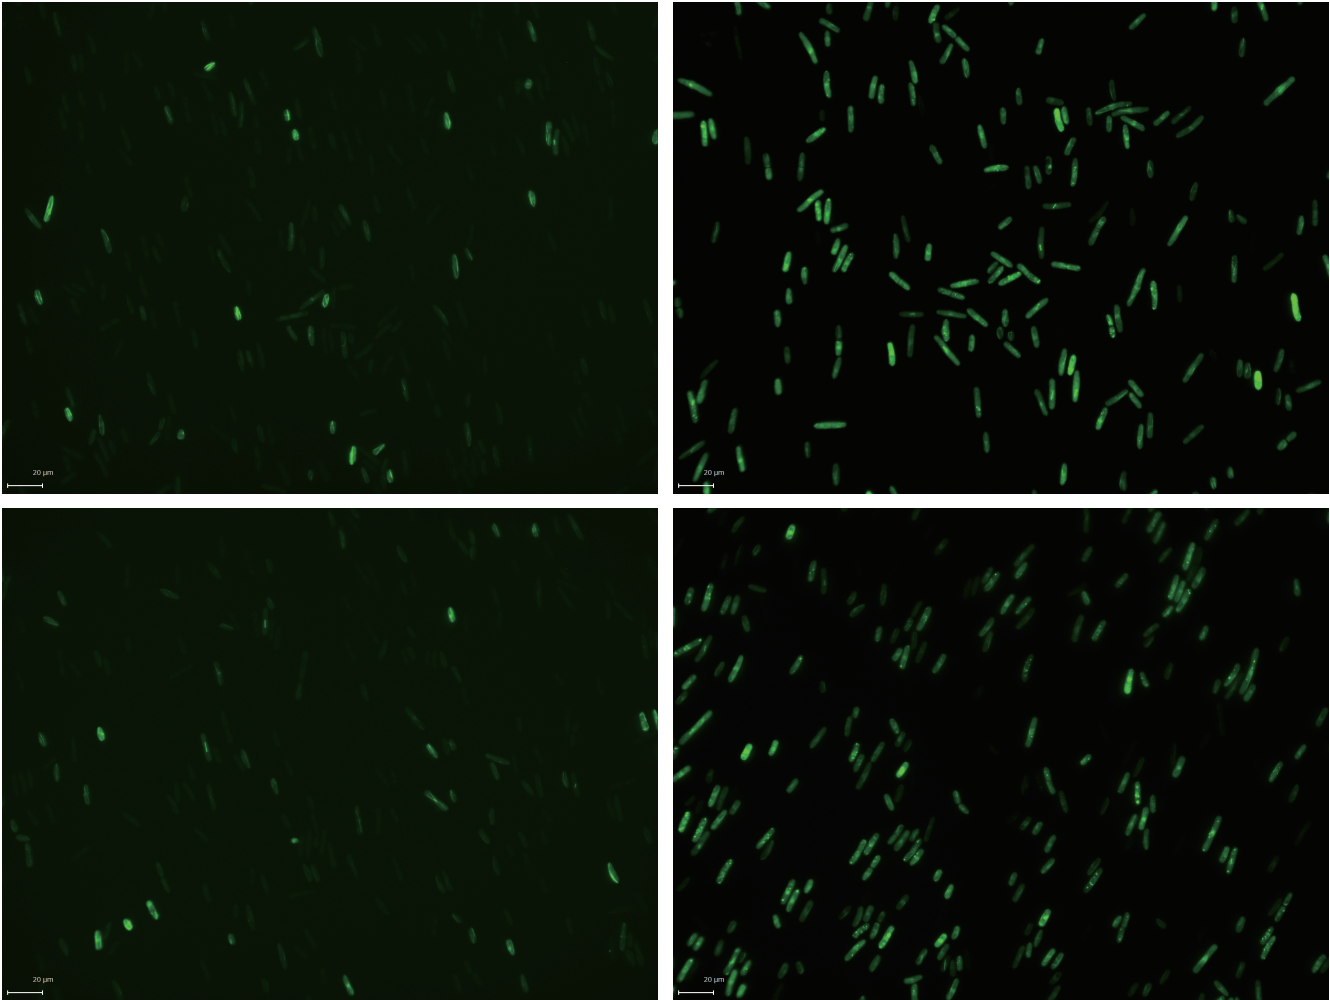

Supplement: inline-supplementary-material-8 [file inline-supplementary-material-8.pdf]
